# Supplementary material for: Elucidation of Binding Features and Dissociation Pathways of Inhibitors and Modulators in SARS-CoV-2 Main Protease by Multiple Molecular Dynamics Simulations
Source: MDPI journal article supplement (doi:10.3390/molecules27206823), 2022-10-12
Supplement: s1 [file s1]

## Supporting Information

**Table S1.** The 160 PDB codes used in this manuscript.

| PDB ID | Ligand     | Idock score (kcal/mol) |
|--------|------------|------------------------|
| 5R7Y   | A_JFM_1001 | -3.63                  |
| 5R7Z   | A_HWH_404  | -5.34                  |
| 5R80   | A_RZG_404  | -4.83                  |
| 5R81   | A_RZJ_1001 | -4.86                  |
| 5R82   | A_RZS_1001 | -3.15                  |
| 5R83   | A_K0G_404  | -4.77                  |
| 5R84   | A_GWS_1001 | -5.75                  |
| 5RE4   | A_SZY_404  | -4.19                  |
| 5RE9   | A_LPZ_404  | -2.73                  |
| 5REB   | A_T0Y_404  | -3.25                  |
| 5REZ   | A_T54_404  | -4.02                  |
| 5RF1   | A_T5G_404  | -3.71                  |
| 5RF6   | A_NTG_404  | -4.57                  |
| 5RF7   | A_T67_404  | -6.05                  |
| 5RFE   | A_JGG_404  | -3.75                  |
| 5RG1   | A_T9J_404  | -3.95                  |
| 5RGH   | A_U0M_404  | -3.93                  |
| 5RGI   | A_U0P_404  | -5.56                  |
| 5RGK   | A_U0V_404  | -2.76                  |
| 5RGT   | A_UHS_405  | -2.38                  |
| 5RGV   | A_UGG_1001 | -6.24                  |
| 5RGW   | A_UGM_1001 | -5.85                  |
| 5RGX   | A_UGP_1001 | -6.21                  |
| 5RGY   | A_UGS_1001 | -6.28                  |
| 5RGZ   | A_UH1_1001 | -6.01                  |
| 5RH0   | A_UH4_1001 | -4.1                   |
| 5RH1   | A_UGV_1001 | -3.49                  |
| 5RH2   | A_UH7_1001 | -6.38                  |
| 5RH3   | A_UHA_1001 | -6.95                  |
| 5RH5   | A_UHV_1001 | -2.22                  |
| 5RH6   | A_UHY_405  | -3.2                   |
| 5RH7   | A_UJ1_405  | -3.75                  |
| 5RH8   | A_UHM_405  | -4.51                  |
| 5RHD   | A_US7_408  | -4.93                  |
| 6M2N   | A_3WL_401  | -7.04                  |
| 6W63   | A_X77_401  | -8.41                  |
| 6WNP   | A_U5G_401  | -1.99                  |
| 6XFN   | ligand     | 0.56                   |
| 7A1U   | A_FUA_401  | -4.98                  |
| 7AGA   | A_LZE_401  | -4.05                  |
| 7ANS   | A_RNW_405  | -3.86                  |
| 7AP6   | A_RQN_401  | -3.89                  |
| 7AVD   | B_S1W_401  | -4.83                  |

|      |            |       |
|------|------------|-------|
| 7AWU | A_S8B_501  | -2.45 |
| 7JU7 | A_G65_401  | -0.26 |
| 7KX5 | A_X7V_401  | -8.4  |
| 7L5D | A_XNJ_401  | 2.66  |
| 5REJ | A_T1V_404  | 2.47  |
| 5REK | A_T1Y_404  | 1.93  |
| 5REL | A_T2G_404  | 0.75  |
| 5REM | A_T2J_404  | 2.18  |
| 5REN | A_T2V_404  | -0.12 |
| 5RER | A_T3J_404  | 0.41  |
| 5RES | A_T3V_404  | 1.77  |
| 5RET | A_T47_404  | 0.21  |
| 5REU | A_T4D_404  | 2.14  |
| 5REV | A_T4J_404  | 3.12  |
| 5REW | A_T4M_404  | 1.14  |
| 5REX | A_T4V_404  | -1.18 |
| 5REY | A_T4Y_404  | -0.04 |
| 5RFF | A_T6M_404  | 1.55  |
| 5RFG | A_T6V_404  | 1.3   |
| 5RFH | A_T6Y_404  | 0.54  |
| 5RFI | A_T71_404  | 0.48  |
| 5RFJ | A_T7A_404  | 0.96  |
| 5RFK | A_T7D_404  | 1.84  |
| 5RFL | A_T7G_404  | 1.97  |
| 5RFM | A_T7J_404  | 2.12  |
| 5RFN | A_T7P_404  | 0.86  |
| 5RFO | A_T7S_404  | 1.72  |
| 5RFP | A_T7V_404  | 0.85  |
| 5RFQ | A_T7Y_404  | 1.68  |
| 5RFR | A_T81_404  | 1.26  |
| 5RFS | A_T84_405  | 0.55  |
| 5RFT | A_T8A_404  | -0.53 |
| 5RFU | A_T8D_405  | 1.87  |
| 5RFV | A_T8J_404  | 1.2   |
| 5RFW | A_T8M_405  | 0.48  |
| 5RFX | A_T8P_404  | 1.84  |
| 5RFY | A_T8S_404  | 1.11  |
| 5RFZ | A_T8V_404  | 2.39  |
| 5RG0 | A_T8Y_405  | 1.61  |
| 5RG2 | A_T9M_404  | 4.88  |
| 5RGL | A_U0Y_404  | 2.47  |
| 5RGM | A_U1D_404  | 0.34  |
| 5RGN | A_U1A_404  | 1.94  |
| 5RGO | A_U1G_404  | 1.56  |
| 5RGP | A_U1M_404  | 1.18  |
| 5RH9 | A_UJ4_405  | -3.96 |
| 5RHA | A_T8M_1001 | 2.14  |
| 5RHB | A_USD_406  | 4.3   |
| 5RHC | A_USA_1001 | 4.23  |

|      |            |       |
|------|------------|-------|
| 5RHE | A_UPD_1001 | 2.58  |
| 5RHF | A_UPJ_405  | 0.42  |
| 5RL0 | A_VEG_1001 | -1.11 |
| 5RL1 | A_VEJ_1001 | -3.26 |
| 5RL2 | A_VEM_1001 | -2.72 |
| 5RL3 | A_VEP_405  | -4.02 |
| 5RL4 | A_VEV_405  | -3.43 |
| 5RL5 | A_VEY_405  | -3.67 |
| 6LZE | A_FHR_405  | -1.68 |
| 6M0K | A_FJC_405  | -1.6  |
| 6WTJ | A_K36_401  | -1.02 |
| 6WTK | A_UED_401  | -2.05 |
| 6WTT | A_K36_401  | -1.51 |
| 6XBG | ligand     | -2.88 |
| 6XBH | ligand     | -3.12 |
| 6XCH | ligand     | -1.21 |
| 6XHM | A_V2M_9001 | -2.47 |
| 6XMK | A_QYS_401  | -2.9  |
| 6XQS | A_SV6_401  | -2.92 |
| 6XQT | A_NNA_401  | -4.06 |
| 6XQU | A_U5G_401  | -2.06 |
| 6XR3 | A_V7G_401  | -2.51 |
| 6Y2F | A_O6K_502  | -2.38 |
| 6Y2G | A_O6K_402  | -1.21 |
| 6YNQ | A_P6N_401  | 1.08  |
| 6YZ6 | ligand     | 0.74  |
| 6ZRT | A_SV6_602  | -2.53 |
| 6ZRU | A_U5G_503  | -2.38 |
| 7ADW | A_R7Q_504  | 2.3   |
| 7AHA | A_SIN_409  | 6.1   |
| 7AKU | A_RN2_401  | -0.79 |
| 7AQJ | A_RV8_402  | -4.59 |
| 7AWS | A_S8E_401  | 27.6  |
| 7AY7 | A_S8T_401  | 5.58  |
| 7B3E | A_MYC_407  | 1     |
| 7B83 | A_PK8_401  | -2.37 |
| 7BRP | A_U5G_401  | -1.43 |
| 7BUY | A_JRY_401  | 3.11  |
| 7C6S | A_U5G_401  | -1.6  |
| 7C6U | A_K36_401  | -0.2  |
| 7C7P | A_SV6_401  | -2.67 |
| 7C8R | A_TG3_401  | -3    |
| 7C8T | A_NOL_401  | -3.44 |
| 7C8U | A_K36_401  | -0.38 |
| 7CBT | A_K36_401  | -1.45 |
| 7COM | A_U5G_401  | -2.2  |
| 7CX9 | A_GKF_401  | 4.01  |
| 7D1M | B_K36_401  | -1.07 |
| 7D1O | A_NNA_401  | -3.37 |



|        | 7AMJ                    |                         |                        |                        |                          | 7AXM                    |                         |                        |                        |                          |
|--------|-------------------------|-------------------------|------------------------|------------------------|--------------------------|-------------------------|-------------------------|------------------------|------------------------|--------------------------|
|        | $\Delta E_{\text{vdw}}$ | $\Delta E_{\text{ele}}$ | $\Delta G_{\text{GB}}$ | $\Delta G_{\text{SA}}$ | $\Delta G_{\text{bind}}$ | $\Delta E_{\text{vdw}}$ | $\Delta E_{\text{ele}}$ | $\Delta G_{\text{GB}}$ | $\Delta G_{\text{SA}}$ | $\Delta G_{\text{bind}}$ |
| His41  | 0                       | 0                       | 0                      | 0                      | 0                        | 0                       | 0                       | 0                      | 0                      | 0                        |
| Cys44  | 0                       | 0                       | 0                      | 0                      | 0                        | 0                       | 0                       | 0                      | 0                      | 0                        |
| Thr45  | 0                       | 0                       | 0                      | 0                      | 0                        | 0                       | 0                       | 0                      | 0                      | 0                        |
| Ser46  | 0                       | 0                       | 0                      | 0                      | 0                        | 0                       | 0                       | 0                      | 0                      | 0                        |
| Met49  | 0                       | 0                       | 0                      | 0                      | 0                        | 0                       | 0                       | 0                      | 0                      | 0                        |
| Asn142 | 0                       | 0                       | 0                      | 0                      | 0                        | 0                       | 0                       | 0                      | 0                      | 0                        |
| Gly143 | 0                       | 0                       | 0                      | 0                      | 0                        | 0                       | 0                       | 0                      | 0                      | 0                        |
| Ser144 | 0                       | 0                       | 0                      | 0                      | 0                        | 0                       | 0                       | 0                      | 0                      | 0                        |
| Cys145 | 0                       | 0                       | 0                      | 0                      | 0                        | 0                       | 0                       | 0                      | 0                      | 0                        |
| His163 | 0                       | 0                       | 0                      | 0                      | 0                        | 0                       | 0                       | 0                      | 0                      | 0                        |
| Met165 | 0                       | 0                       | 0                      | 0                      | 0                        | 0                       | 0                       | 0                      | 0                      | 0                        |
| Glu166 | 0                       | -0.08                   | 0.08                   | 0                      | 0                        | 0                       | 0                       | 0                      | 0                      | 0                        |
| Gln189 | 0                       | 0                       | 0                      | 0                      | 0                        | 0                       | 0                       | 0                      | 0                      | 0                        |
| Gln192 | 0                       | 0                       | 0                      | 0                      | 0                        | 0                       | 0                       | 0                      | 0                      | 0                        |
| Ile213 | -2.60                   | -0.10                   | 0.32                   | -0.48                  | -2.86                    | -4.02                   | -0.24                   | 0.68                   | -0.62                  | -4.22                    |
| Gln256 | -3.80                   | 0.02                    | 1.34                   | -0.84                  | -3.28                    | -4.32                   | -1.86                   | 2.58                   | -0.92                  | -4.52                    |
| Val297 | -5.50                   | -0.12                   | 0.62                   | -0.74                  | -5.72                    | -1.68                   | -0.38                   | 0.40                   | -0.28                  | -1.96                    |
| Arg298 | -2.40                   | -3.62                   | 3.74                   | -0.30                  | -2.60                    | -0.18                   | -0.10                   | 0.22                   | 0                      | -0.06                    |
| Cys300 | -4.04                   | -0.62                   | 1.46                   | -0.58                  | -3.80                    | -7.16                   | 0.10                    | 2.08                   | -1.02                  | -5.98                    |
| Ser301 | -2.34                   | -0.72                   | 1.14                   | -0.48                  | -2.42                    | -2.84                   | -0.20                   | 0.86                   | -0.32                  | -2.48                    |
